1 **Main Manuscript for**

2 **Epistasis is not a strong constraint on the recurrent evolution of toxin-**  
3 **resistant Na<sup>+</sup>,K<sup>+</sup>-ATPases among tetrapods.**

4

5 Shabnam Mohammadi<sup>1,2,\*</sup>, Lu Yang<sup>3, §,\*</sup>, Santiago Herrera-Álvarez<sup>4,5,\*</sup>, María del Pilar Rodríguez-  
6 Ordoñez<sup>4,#</sup>, Karen Zhang<sup>3</sup>, Jay F. Storz<sup>1</sup>, Susanne Dobler<sup>2</sup>, Andrew J. Crawford<sup>4</sup> & Peter  
7 Andolfatto<sup>6</sup>

8 <sup>1</sup>School of Biological Sciences, University of Nebraska, Lincoln, NE, USA

9 <sup>2</sup>Molecular Evolutionary Biology, Institute of Zoology, Biocenter Grindel, Universität Hamburg,  
10 Hamburg, Germany

11 <sup>3</sup>Department of Ecology and Evolution, Princeton University, Princeton, NJ, USA

12 <sup>4</sup>Department of Biological Sciences, Universidad de los Andes, Bogotá, 111711, Colombia

13 <sup>5</sup>Department of Ecology and Evolution, University of Chicago, Chicago, IL, USA

14 <sup>6</sup>Department of Biological Sciences, Columbia University, New York, NY, USA

15

16 \*Co-first authorship

17 § Current address: Wellcome Sanger Institute, Cambridge, United Kingdom

18 # Current address: Université Paris-Saclay Evry, Evry, France

19

20 **Email:** [andrew@dna.ac](mailto:andrew@dna.ac), [pa2543@columbia.edu](mailto:pa2543@columbia.edu)

21

22 SM: 0000-0003-3450-6424, LY: 0000-0002-2694-1189, SHA: 0000-0002-0793-7811, MPRO:  
23 0000-0002-0856-1297, KZ: 0000-0003-4406-9977, JFS: 0000-0001-5448-7924, SD: 0000-0002-  
24 0635-7719, AJC: 0000-0003-3153-6898, PA: 0000-0003-3393-4574

25

26 **Classification**

27 Biological Sciences; Evolution

28 **Keywords**

29 Epistasis, protein evolution, cardiotoxic steroids, toxin resistance, adaptation

30 **Author Contributions**

31 PA and AJC conceived of and oversaw the project; SM, JFS, SD, AJC and PA  
32 designed experiments; KZ, LY, MPRO, SHA, SM collected data; SM, SHA and PA  
33 performed evolutionary and statistical analyses; SM, SHA, and PA wrote the paper; All authors  
34 edited the manuscript.

35 **This PDF file includes:**

36 Main Text

37 Figures 1 to 6

38

39 **Abstract**

40 Comparative genomic studies reveal a global decline in rates of convergent amino acid substitution  
41 as a function of evolutionary distance. This pattern has been attributed to epistatic constraints on  
42 protein evolution, the idea being that mutations tend to confer the same fitness effects on more  
43 similar genetic backgrounds, so convergent substitutions are more likely to occur in closely related  
44 species. However, this hypothesis lacks experimental validation. We tested this model in the  
45 context of the recurrent evolution of resistance to cardiotonic steroids (CTS) across diverse groups  
46 of tetrapods, which occurs via specific amino acid substitutions to the  $\alpha$ -subunit family of  $\text{Na}^+, \text{K}^+$ -  
47 ATPases (ATP1A). After identifying a series of recurrent substitutions at two key sites of ATP1A1  
48 predicted to confer CTS resistance, we performed protein engineering experiments to test the  
49 functional consequences of introducing these substitutions onto divergent species backgrounds.  
50 While we find that substitutions at these sites can have substantial background-dependent effects  
51 on CTS resistance, we also find no evidence for background-dependent effects on protein activity.  
52 We further show that the magnitude of a substitution's effect on activity does not depend on the  
53 overall extent of ATP1A1 sequence divergence between species. More generally, a global analysis  
54 of substitution patterns across ATP1A orthologs and paralogs reveals that the probability of  
55 convergent substitution protein-wide is not predicted by sequence divergence. Together, these  
56 findings suggest that intramolecular epistasis is not an important constraint on the evolution of  
57 ATP1A CTS resistance in tetrapods.

58

59 **Significance Statement**

60 Individual amino acid residues within a protein work in concert to produce a functionally coherent  
61 structure that must be maintained even as orthologous proteins in different species diverge over  
62 time. Given this dependence, we expect identical mutations to have more similar effects on protein  
63 function in more closely related species. We tested this hypothesis by performing protein-  
64 engineering experiments on ATP1A, an enzyme mediating target-site insensitivity to cardiotonic  
65 steroids (CTS) in diverse animals. These experiments reveal that although the phenotypic effects  
66 of substitutions can sometimes be background-dependent, the magnitude of these effects does not  
67 correlate with ATP1A1 sequence divergence. This implies that the genetic background across the  
68 ATP1A protein does not strongly limit the evolution of CTS resistance in animals.

69 **Main Text**

70

71 **Introduction**

72

73 Patterns of molecular parallelism and convergence represent a useful paradigm to examine the  
74 factors that limit the rate of adaptation and the extent to which adaptive evolutionary paths are  
75 predictable (1, 2). In the context of protein evolution, patterns of parallelism and convergence are  
76 influenced by pleiotropy (the effect of a given mutation on multiple phenotypes) and intramolecular  
77 epistasis (nonadditive interactions between mutant sites in the same protein) (3–11). If the  
78 phenotypic and fitness effects of mutations depend on the genetic background on which they arise  
79 (i.e. epistasis), a given mutation is expected to have more similar effects in orthologs from closely  
80 related species. Therefore, the probability of parallel or convergent substitution resulting in  
81 sequence divergence between species is expected to decrease with divergence time. Consistent  
82 with this expectation, there is evidence for such a decline in broad-scale phylogenetic comparisons  
83 of mitochondrial (12) and nuclear (13, 14) proteins. However, this hypothesis has not been tested  
84 experimentally to date.

85

86 To address the question of how changes in the genetic background alter the phenotypic effects of  
87 new mutations, we focus on the test case of the repeated evolution of resistance to cardiotoxic  
88 steroids (CTS) in animals. CTS are potent inhibitors of Na<sup>+</sup>,K<sup>+</sup>-ATPase (NKA), a protein that plays  
89 a critical role in maintaining membrane potential and is consequently vital for the maintenance of  
90 many physiological processes and signaling pathways in animals (15). NKA (Fig. 1A) is a  
91 heterodimeric transmembrane protein that consists of a catalytic  $\alpha$ -subunit (ATP1A) and a  
92 glycoprotein  $\beta$ -subunit (ATP1B) (16). CTS inhibit NKA function by binding to a highly conserved  
93 domain of ATP1A and blocking the exchange of Na<sup>+</sup> and K<sup>+</sup> ions (15). NKA is thus often the target  
94 of parallel evolution of CTS resistance in insect herbivores that feed on toxic plants (17, 18) as well  
95 as vertebrate predators that feed on toxic prey (19–22). Functional investigations of CTS  
96 resistance-conferring substitutions in *Drosophila* (23, 24) and Neotropical grass frogs (25) revealed  
97 associated negative pleiotropic effects on protein function and showed that substitutions elsewhere  
98 in the protein mitigate these effects. However, despite these examples, the generality of these  
99 patterns, and specifically the predicted dependence on evolutionary distance, remain poorly  
100 understood given the limited availability of comparative functional data.

101

102 Broad phylogenetic comparisons in vertebrates have focused primarily on the H1-H2 extracellular  
103 loop of ATP1A proteins, a subset of the CTS-binding domain that contains two sites (111 and 122)  
104 known to underlie CTS resistance in rats and toad-eating frogs (25, 26). Most vertebrates possess  
105 three paralogs of the  $\alpha$ -subunit gene (ATP1A) that have different tissue-specific expression profiles  
106 and are associated with distinct physiological roles (Fig. 1B) (15, 27). Mammals possess a fourth

107 paralog that is expressed predominantly in testes (28). A major limitation of studies to date is that  
108 the H1-H2 extracellular loop has been inconsistently surveyed among vertebrate taxa, with  
109 previous studies focusing on ATP1A3 in reptiles (20, 21, 29, 30), ATP1A1 and/or ATP1A2 in birds  
110 and mammals (30, 31), and either ATP1A1 or ATP1A3 in amphibians (19, 30). We therefore lack  
111 a comprehensive survey of amino acid variation in the ATP1A protein family across vertebrates.

112

113 To bridge this gap, we first surveyed variation in near full-length coding sequences of the three  
114 NKA  $\alpha$ -subunit paralogs (ATP1A1, ATP1A2, ATP1A3) that are shared across major extant tetrapod  
115 groups (mammals, birds, non-avian reptiles, and amphibians), and identified substitutions that  
116 occur repeatedly among divergent lineages. Focusing on two key sites implicated in CTS resistance  
117 across animals (111 and 122), we tested whether substitutions at these sites have increasingly  
118 distinct phenotypic effects on more divergent genetic backgrounds. Specifically, we engineered  
119 several common substitutions at sites 111 and 122 of ATP1A1 that differ between species to reveal  
120 potential 'cryptic' epistasis (8, 32). By quantifying the level of CTS resistance conferred by these  
121 substitutions, as well as their effects on enzyme function, we evaluate the extent to which pleiotropy  
122 and epistasis have constrained the evolution of CTS-resistant forms of ATP1A1 across tetrapods.

123

124

## 125 **Results**

126

### 127 **Patterns of ATP1A sequence evolution across species and paralogs.**

128

129 To obtain a more comprehensive portrait of ATP1A amino acid variation among tetrapods, we  
130 created multiple sequence alignments for near full-length ATP1A proteins for the three ATP1A  
131 paralogs shared among vertebrates. In addition to publicly available data, we generated new RNA-  
132 seq data for 27 non-avian reptiles (PRJNA754197) (Table S1-S2). We then *de novo* assembled  
133 full-length transcripts of all ATP1A paralogs using these and RNA-seq data from 18 anuran species  
134 (25) (PRJNA627222) to achieve better representation for these groups. In total, this dataset  
135 comprises 429 species for ATP1A1, 197 species for ATP1A2 and 204 species for ATP1A3 (831  
136 sequences total; Supplemental Dataset 1, Fig. S1).

137

138 Our survey reveals numerous substitutions at sites implicated in CTS resistance of NKA (Fig. 2;  
139 Supplementary Dataset 2; for comparison to insects, see Supplementary file 1 of ref. (23)). As  
140 anticipated from studies of full-length sequences in insects (17, 18, 23), most amino acid variation  
141 among species and paralogs is concentrated in the H1-H2 extracellular loop (residues 111-122;  
142 Fig 1A). Despite harboring just 28% of 43 sites previously implicated in CTS resistance (33), the

143 H1-H2 extracellular loop contains 81.4% of all substitutions identified among the three ATP1A  
144 paralogs (Fig. S2).

145 Our survey reveals several clade- and paralog-specific patterns. Notably, ATP1A1 exhibits more  
146 variation among species at sites implicated in CTS resistance (Fig. 2). Most of the variation in  
147 ATP1A2 at these sites is restricted to squamate reptiles and ATP1A3 lacks substitutions at site 122  
148 altogether, despite the well-known potential for substitutions at this site to confer CTS resistance  
149 (25, 26). Looking across species and paralogs, the extent of parallelism at sites 111 and 122 is  
150 remarkable (Figs. 2-3): for example, the substitutions Q111E, Q111T, Q111H, Q111L, and Q111V  
151 all occur in parallel in multiple species of both insects and vertebrates. N122H and N122D also  
152 frequently occur in parallel in both of these major clades. The frequent parallelism of CTS-sensitive  
153 (i.e. Q111 and N122) to CTS-resistant states at these sites has been interpreted as evidence for  
154 adaptive significance of these substitutions (17–20), but may also reflect mutation biases (34) and  
155 the nature of physico-chemico constraints (13, 35).

156 In contrast, some parallelism is restricted to specific clades: for example, Q111R occurs in parallel  
157 across tetrapods but has not been observed in insects. Similarly, the combination Q111R+N122D  
158 has evolved three times independently in ATP1A1 of tetrapods but is not observed in insects.  
159 Conversely, insects have evolved Q111V+N122H independently four times, but this combination  
160 has never been observed in tetrapods. These patterns suggest that the fitness effects of some  
161 CTS-resistant substitutions depend on genetic background, with the result that CTS-resistance  
162 evolved via different mutational pathways in different lineages.

163 Beyond known CTS-resistant substitutions at sites 111 and 122, some taxa have evolved other  
164 paths to CTS resistance. For example, the Pacman frog (genus *Ceratophrys*) is known to prey on  
165 CTS-containing toads (36) and its ATP1A1 harbors a known CTS-resistant substitution at site 121  
166 (D121N, Supplementary Dataset 2). This substitution is rare among vertebrates but has been  
167 previously reported in CTS-adapted milkweed bugs (17, 18). Similarly, the known CTS resistance  
168 substitution C104Y is observed among many natricid snakes (Supplementary Dataset 2) and CTS-  
169 adapted milkweed weevils (18). Chinchilla (*Chinchilla lanigera*) and yellow-throated sandgrouse  
170 (*Pterocles gutturalis*) show distinct single-amino acid insertions in the H1–H2 extracellular loop, a  
171 characteristic that has been previously associated with CTS resistance in pyrgomorphid  
172 grasshoppers (33, 37). Further, *in lieu* of variation at site 122, ATP1A3 of tetrapods harbors  
173 frequent parallel substitutions at site 120 (G120R). Interestingly, this site also shows substantial  
174 parallel substitution in the ATP1A1 paralog of birds (where N120K occurs eight times  
175 independently) but is mostly invariant in ATP1A1 of other tetrapods.

176

177 **Context-dependent CTS resistance for substitutions at sites 111 and 122**

178

179 The clade- and paralog-specific patterns of substitution among ATP1A paralogs outlined above  
180 suggest that the evolution of CTS resistance may be highly dependent on sequence context.  
181 However, the functional effects of the vast majority of these substitutions on the diverse genetic  
182 backgrounds in which they occur remain largely unknown (25, 26, 29). Given the diversity and  
183 broad phylogenetic distribution of parallel substitutions at sites 111 and 122, and the documented  
184 effects of some of these substitutions on CTS resistance, we experimentally tested the extent to  
185 which functional effects of substitutions at these sites are background-dependent.

186

187 We focused functional experiments on ATP1A1, because it is the most ubiquitously expressed  
188 paralog and exhibits both the most sequence diversity and the broadest phylogenetic distribution  
189 of parallel substitutions. Specifically, we considered ATP1A1 orthologs from nine representative  
190 tetrapod species that possess different combinations of wild-type amino acids at 111 and 122 (Fig.  
191 4A). Our taxon sampling includes two lizards, two snakes, two birds, two mammals and previously  
192 published data for one amphibian (Fig. S4; Fig. S5; Table S3). The ancestral amino acid states of  
193 sites 111 and 122 in tetrapods are Q and N, respectively. We found that the sum of the number of  
194 derived states at positions 111 and 122 is a strong predictor of the level of CTS-resistance (Fig 4B,  
195  $IC_{50}$ , Spearman's  $r_s=0.85$ ,  $p=0.001$ ). Nonetheless, we also found greater than 10-fold variation in  
196 CTS-resistance among enzymes that had identical paired states at 111 and 122 (e.g., compare  
197 chinchilla (CHI) versus red-necked keelback snakes (KEE) or compare rat (RAT) versus the  
198 resistant paralog of grass frogs ( $GRA_R$ )). These differences suggest that substitutions at other sites  
199 also contribute to CTS resistance.

200

201 To test for epistatic effects of common CTS-resistant substitutions at sites 111 and 122, we used  
202 site-directed mutagenesis to introduce 15 substitutions (nine at position 111 and six at position 122)  
203 in the wildtype ATP1A1 backgrounds of 9 different species (Fig. S4). The specific substitutions  
204 chosen were either phylogenetically broadly-distributed parallel substitutions and/or divergent  
205 substitutions that distinguish closely related clades of species. We expressed each of these 24  
206 ATP1A1 constructs with an appropriate species-specific ATP1B1 protein (Table S3). For each  
207 recombinant NKA protein complex, we characterized its level of CTS resistance ( $IC_{50}$ ) and we  
208 estimated enzyme activity as the rate of ATP hydrolysis in the absence of CTS (Table S4).

209

210 Of the 12 substitutions for which  $IC_{50}$  could be measured, substitutions had a 15-fold effect on  
211 average (Fig. 4C, Table S4) and were equally likely to increase or decrease  $IC_{50}$ . To assess the

212 background-dependence of specific substitutions, we examined five cases in which a given  
213 substitution (e.g., E111H), or the reverse substitution (e.g., H111E), could be evaluated on two or  
214 more backgrounds. In the absence of intramolecular epistasis, the effect of a substitution in different  
215 backgrounds should remain unchanged and the magnitude of the effect of the reverse substitution  
216 should also be the same but with opposite sign. This analysis revealed substantial background  
217 dependence for IC<sub>50</sub> in two of the five informative cases (Fig. 4E; Table S5). In one case, the N122D  
218 substitution results in a 200-fold larger increase in IC<sub>50</sub> when added to the chinchilla (CHI)  
219 background compared to the grass frog (GRA) background ( $p=1.2e-3$  by ANOVA). In the other  
220 case, the E111H substitution and the reverse substitution (H111E) produced effects in the same  
221 direction (reducing CTS-resistance) when added to different backgrounds (false fer-de-lance (FER)  
222 and red-necked keelback (KEE) snakes, respectively,  $p=1e-7$  by ANOVA). Overall, these results  
223 suggest that the effect of a given substitution on IC<sub>50</sub> can be strongly dependent on the background  
224 on which it occurs. The remaining three substitutions (H111T, Q111R and H122D) showed no  
225 significant change in the magnitude of the effect on IC<sub>50</sub> when introduced into different species'  
226 backgrounds. These results suggest that, while some substitutions can have strong background-  
227 dependent effects, strong intramolecular epistasis with respect to CTS resistance is not universal.

228

#### 229 **Pleiotropic effects on NKA activity exhibit little evidence for background-dependence.**

230

231 We next tested whether substitutions at sites 111 and 122 have pleiotropic effects on ATPase  
232 activity. Because ion transport across the membrane is a primary function of NKA and its disruption  
233 can have severe pathological effects (38), mutations that compromise this function are likely to be  
234 under strong purifying selection. As suggested by previous work (23–25), CTS-resistant  
235 substitutions at sites 111 and 122 can decrease enzyme activity. We evaluated the generality of  
236 these effects by comparing enzyme activity of the 15 mutant NKA proteins to their corresponding  
237 wild-type proteins.

238

239 Interestingly, the wild-type enzymes themselves exhibit substantial variation in activity, from 3-18  
240 nmol/mg\*min ( $P = 6e-7$  by ANOVA, Fig 4D; Table S4). On average, substitutions at sites 111 and  
241 122 changed enzyme activity by 60% (Fig 4D; Fig S4). In two cases, amino acid substitutions at  
242 position 122 (N122H and H122D) nearly inactivate lizard NKAs and, in one case, a substitution at  
243 position 111 (Q111T) resulted in low expression of the recombinant protein in the transfected cells  
244 (Fig S5; Fig. S6). A test of uniformity of pairwise t-test p-values across substitutions suggests a  
245 significant enrichment of low p-values (Fig 4D inset;  $p=2.5e-4$ , chi-squared test of uniformity). Thus,  
246 globally, this set of substitutions has significant effects on NKA activity, but they were not



247 significantly more likely to decrease than increase activity (10 decrease: 5 increase,  $p > 0.3$ , binomial  
248 test, Fig. 4D, Table S5).

249

250 We next asked to what extent pleiotropic effects of CTS resistant substitutions at positions 111 and  
251 122 are dependent on genetic background. This question is motivated by recent studies in insects  
252 which revealed that deleterious pleiotropic effects of some resistance-conferring substitutions at  
253 sites 111 and 122 are background-dependent (23, 24). Likewise, recent work on ATP1A1 of toad-  
254 eating grass frogs showed that effects of Q111R and N122D on NKA activity are background-  
255 dependent (25). In contrast, among the five informative cases in which we compared the same  
256 substitution (or the reverse substitution) on two or more backgrounds, there is little evidence for  
257 background dependence (Fig 4E; Table S5). For example, N122D has similar effects on NKA  
258 activity in grass frog and chinchilla despite the substantial divergence between the species' proteins  
259 (8.4% protein sequence divergence; Fig. 4D). Similarly, the effects of Q111R in ostrich or the  
260 reverse substitution R111Q in sandgrouse were not significantly different from the effect of Q111R  
261 in grass frog (7.5% and 8% protein sequence divergence, respectively).

262

263 To further examine the evidence for background dependence, we tested whether changes to the  
264 same amino acid state (regardless of starting state) at 111 and 122 produce different changes in  
265 NKA activity (e.g., R111E on the rat background versus H111E on the false fer-de-lance  
266 background). If epistasis is important, we expect that the difference in effects of substitutions to a  
267 given amino acid state should increase with increasing sequence divergence compared to ATP1A1  
268 backgrounds in which that state is wild-type. However, across the 11 possible comparisons, we  
269 found no relationship between the difference in the effect of substitutions to the same state and the  
270 extent of amino acid divergence between the orthologous proteins (Fig. 5). This pattern suggests  
271 that, while pleiotropic effects can be background dependent (23, 25), these effects are not  
272 pervasive across species and do not correlate with overall sequence divergence.

273

274

275 **The overall rate of convergence across ATP1A proteins does not depend on sequence**  
276 **divergence.**

277

278 If intramolecular epistasis is pervasive, we would predict that rates of convergent substitution  
279 should decrease as a function of overall sequence divergence (12–14). In contrast to this  
280 expectation, our experiments suggest that, for ATP1A1, the extent of background sequence  
281 divergence is a poor predictor of the magnitude of effects of substitutions at sites 111 and 122 on  
282 CTS resistance and enzyme activity. Since our experiments were necessarily limited in scope, we



283 carried out a broad phylogenetic analysis to evaluate how well our findings align with global  
284 estimates of rates of convergence for the ATP1A family beyond ATP1A1 and beyond sites  
285 implicated in CTS resistance.

286

287 Using a multisequence alignment of 831 ATP1A protein sequences, including the three ATP1A  
288 paralogs shared among tetrapods (i.e., amphibians, non-avian reptiles, birds, and mammals), we  
289 inferred a maximum likelihood phylogeny of the gene family (Fig. S1). We then used ancestral  
290 sequence reconstruction to infer the history of substitution events on all branches in the tree and  
291 counted the number of convergent amino acid substitutions along the protein per site (see Materials  
292 and Methods). Convergent substitutions are defined as substitutions on two branches at the same  
293 site resulting in the same amino acid state. Interestingly, we do not detect a correlation between  
294 the relative number of convergent substitutions with background ATP1A divergence across the tree  
295 (Fig. 6A). This result also holds true when considering only substitutions to the key CTS resistance  
296 sites 111 and 122 (Fig. S5).

297

298 To gain more insight into the factors that determine convergent evolution in ATP1A, we looked  
299 more closely at patterns of individual convergent substitutions at sites 111 and 122 by extracting  
300 each convergent substitution and visualizing its distribution along the sequence divergence axis  
301 (Fig. 6B). Under the expectation that rates of convergence should tend to decrease as a function  
302 of sequence divergence, the distribution of pairwise convergent events along the sequence  
303 divergence axis should be left-skewed, with a peak towards lower sequence divergence. In contrast  
304 to this expectation, the distribution is bimodal, with one peak at 0.33 and the other at 0.69  
305 substitutions/site (Fig. 6B bottom panel). Parallel and convergent substitutions have occurred  
306 almost across the full range of protein divergence estimates. For example, if X is any starting state,  
307 the substitution X111R has occurred independently in 13 tetrapod lineages and X111L  
308 independently in 20 lineages. Both substitutions have a broad phylogenetic distribution, suggesting  
309 that their effects do not strongly depend on overall genetic background. Interestingly, however, the  
310 distributions for X111H and X111E substitutions are relatively right-skewed, in line with epistasis  
311 for CTS resistance that we observed in experiments for H111E/E111H (Fig 4E). Overall, the results  
312 of these analyses align well with our functional experiments but run contrary to expectations based  
313 on previously reported proteome-wide evolutionary trends (12–14).

314

## 315 **Discussion**

316

317 Previous work has suggested that rates of convergent amino-acid substitution generally decline as  
318 a function of time, a pattern that can potentially be explained by epistatic constraints. According to

319 this view, the higher the level of sequence divergence between a given pair of homologs, the higher  
320 the probability that the same mutation will have different fitness effects on the two backgrounds  
321 (12). In that respect, our broad survey of the ATP1A gene family in tetrapods, in combination with  
322 previous work, reveals two striking and seemingly contradictory patterns. The first is that some  
323 substitutions underlying CTS resistance in tetrapods are broadly distributed phylogenetically and  
324 even shared with insects (e.g., N122H is widespread among snakes and found in the monarch  
325 butterfly and other insects; see Fig. 3 for more examples). Patterns like these suggest that epistatic  
326 constraints have a limited role in the evolution of CTS resistance, as the same mutation can be  
327 favored on highly divergent genetic backgrounds. On the other hand, there is also substantial  
328 diversity in resistance-conferring states at sites 111 and 122, and some combinations of these  
329 substitutions appear to be phylogenetically restricted. For example, the CTS-resistant combination  
330 of Q111R+N122D has evolved multiple times in tetrapods but is absent in insects, whereas the  
331 CTS-resistant combination Q111V+N122H evolved multiple times in insects but is absent in  
332 tetrapods (Fig 3). Additionally, some substitutions also appear to be paralog-specific in tetrapods  
333 (Fig 3). These phylogenetic signatures suggest at least some role for epistasis as a source of  
334 contingency in the evolution of ATP1A-mediated CTS resistance in animals (i.e., the fitness effects  
335 of substitutions depend on the order in which they occur). How can these disparate patterns be  
336 reconciled? To what extent do genetic background and contingency limit the evolution of CTS  
337 resistance in animals?

338

339 In our survey of putative CTS-resistant substitutions at sites 111 and 122, we find that derived  
340 substitutions have largely predictable effects on CTS resistance, with notable exceptions that tend  
341 to be in magnitude rather than direction (Fig. 4C and 4E). While derived states at sites 111 and 122  
342 are generally a reliable predictor of CTS resistance (Fig. 4A), they do not always predict the effect  
343 size of particular substitutions (e.g., Q111R contributes to CTS resistance on many species'  
344 backgrounds, but not on that of sandgrouse, Fig. 4C). It is also notable that species with identical  
345 paired states at 111 and 122 can vary in CTS resistance by more than an order of magnitude. Both  
346 patterns point to background determinants of CTS resistance that may be additive rather than  
347 epistatic. Yet there are some broadly phylogenetically distributed substitutions, such as N122D,  
348 that nonetheless do exhibit background-dependent effects on CTS resistance (Fig. 4C and 4E).

349

350 While epistasis is likely to be a pervasive feature in protein evolution, many mutational effects on  
351 structural and functional properties of proteins appear to be purely additive (e.g., (39–41). In line  
352 with this, our experimental results revealed that the phenotypic effects of individual substitutions  
353 on ATPase activity are likely to be additive in general. We also found no correlation between the  
354 marginal effect of a substitution with background genetic divergence. Specifically, mutating to the

355 same amino acid state (irrespective of the initial state) doesn't result in larger effects in more distant  
356 backgrounds. Under additivity, the rate of convergence is expected to be uncorrelated with  
357 background genetic distance because the phenotypic effect of a mutation does not depend on the  
358 amino acid states at other sites in the protein. Our phylogenetic and experimental results align with  
359 this expectation.

360

361 While the extent to which changes in CTS resistance are favorable to an organism depend on  
362 physiological constraints and the specific ecological context (e.g., in which tissues NKA is  
363 expressed and the presence of dietary CTS), changes in enzyme activity associated with these  
364 substitutions are most likely detrimental to organismal fitness. It follows that changes to the ATP1A1  
365 background would be required to offset such changes in enzyme activity. Surprisingly, we found  
366 that, with rare exceptions, CTS-resistant substitutions at sites 111 and 122 tend to exhibit little or  
367 no pleiotropy with respect to enzyme activity. In addition, amino acid substitutions were not  
368 significantly more likely to decrease rather than increase activity. Interestingly, the activity of  
369 wildtype ATP1A1 enzymes varies 6-fold among the species surveyed (Fig. 4E), suggesting that  
370 most species are either robust to changes in NKA activity, or that changes have occurred in other  
371 genes (including other ATP1A paralogs) that compensate for changes in activity. Thus, it may be  
372 that protein activity itself is either not an important pleiotropic constraint on the evolution of ATP1A  
373 CTS resistance or that constraint depends not just on the protein background, but also on the  
374 background at higher levels (e.g., other interacting proteins). A further possibility is that detrimental  
375 effects of CTS resistant substitutions depend on few sites, and these sites are also highly  
376 convergent (e.g., A119S among insect herbivores, see refs. 23 and 24).

377

378 We conclude that intramolecular epistasis in ATP1A -- at the level of protein activity -- is unlikely to  
379 represent a substantial constraint in the evolution of CTS resistance. However, the lack of evidence  
380 of epistasis at the level of protein function does not preclude an important role for epistasis at higher  
381 levels. For example, our results are also consistent with a scenario of nonspecific (or global)  
382 epistasis, where mutations have additive effects on molecular phenotypes (e.g., ATPase activity)  
383 but have nonadditive effects on fitness due to a nonlinear relationship between phenotype and  
384 fitness (7, 40, 42). Nonspecific epistasis predicts a many-to-one relationship with respect to genetic  
385 backgrounds and specific mutations (7, 42), such that many genetic backgrounds can compensate  
386 for the deleterious effects of a given mutation. Thus, nonspecific epistasis of this form could explain  
387 why CTS resistant substitutions at sites 111 and 122 exhibit broad phylogenetic distributions.

388

389 Dependence on few sites, or the many-to-one nature of non-specific epistasis, may also account  
390 for the weak signature of decreasing convergence with increasing divergence for ATP1A. Our study

391 suggests that, while intramolecular epistasis may be pervasive across proteomes, it does not  
392 always represent a substantial constraint on the evolution of adaptive traits, as we show here for  
393 CTS resistance in tetrapods. Further evaluation of epistasis at higher levels than enzyme activity  
394 (e.g., whole organism neural function, CTS tolerance or viability, refs. 23, 24) may elucidate the  
395 extent to which nonspecific epistasis constrains protein evolution in these cases.  
396

## 397 **Materials and Methods**

398

### 399 **Sample collection and data sources.**

400 In order to carry out a comprehensive survey of vertebrate ATP1A paralogs, we collated a total of  
401 831 protein sequences for this study (Supplementary Dataset 1). In addition to publicly available  
402 data, we also generated RNA-seq data for 27 species of non-avian reptiles (Table S1;  
403 PRJNA754197) to achieve a better representation of some previously underrepresented lineages.  
404 These included field-caught and museum-archived specimens as well as animals purchased from  
405 commercial pet vendors. Purchased animals were processed following the procedures specified in  
406 the IACUC Protocol No. 2057-16 (Princeton University) and implemented by a research  
407 veterinarian at Princeton University. Wild-caught animals were collected under Colombian umbrella  
408 permit *resolución No. 1177* granted by the *Autoridad Nacional de Licencias Ambientales* to the  
409 Universidad de los Andes and handled according to protocols approved by the Institutional  
410 Committee on the Care and Use of Laboratory Animals (abbreviated CICUAL in Spanish) of the  
411 Universidad de los Andes. In all cases, fresh tissues (brain, stomach, and muscle) were taken and  
412 preserved in RNAlater (Invitrogen) and stored at -80°C until used.

413

### 414 **Reconstruction of ATP1A paralogs.**

415 RNA-seq libraries were prepared either using TruSeq RNA Library Prep Kit v2 (Illumina) and  
416 sequenced on Illumina HiSeq2500 (Genomics Core Facility, Princeton, NJ, USA) or using NEBNext  
417 Ultra RNA Library Preparation Lit (NEB) and sequenced on Illumina HiSeq4000 (Genewiz, South  
418 Plainfield, NJ, USA) (Table S2). All raw RNA-seq data generated for this study have been deposited  
419 in the National Center for Biotechnology Information (NCBI) Sequence Read Archive (SRA) under  
420 bioproject PRJNA754197. Together with SRA datasets downloaded from public database, reads  
421 were trimmed to Phred quality  $\geq 20$  and length  $\geq 20$  and then assembled *de novo* using Trinity  
422 v2.2.0 (43). Sequences of ATP1A paralogs 1, 2 and 3 were pulled out with BLAST searches (blast-  
423 v2.26), individually curated, and then aligned using ClustalW. Complete alignments of ATP1/2/3  
424 can be found in Supplementary Dataset 1.

425

### 426 **Character state mapping and parameter estimation for the ATP1A1-3 paralogs**

427 Protein sequences from ATP1A1 (N=429), ATP1A2 (N=197) and ATP1A3 (N=205) including main  
428 tetrapod groups (amphibians, non-avian reptiles, birds, and mammals) and lungfish+coelacanth as  
429 outgroups were aligned using ClustalW with default parameters. The optimal parameters for  
430 phylogenetic reconstruction were taken from the best-fit amino acid substitution model based on  
431 Akaike Information Criterion (AIC) as implemented in ModelTest-NG v.0.1.5 (44), and was inferred  
432 to be JTT+G4+F. An initial phylogeny was inferred using RAxML HPC v.8 (45) under the  
433 JTT+GAMMA model with empirical amino acid frequencies. Branch lengths and node support

434 (aLRS) were further refined using PhyML v.3.1 (46) with empirical amino acid frequencies and  
435 maximum likelihood estimates of rate heterogeneity parameters,  $I$  and  $\Gamma$ . Phylogeny visualization  
436 and mapping of character states for each paralog was done using the R package ggtree (47).

437

#### 438 **Ancestral sequence reconstruction and convergence calculations**

439 Ancestral sequence reconstruction (ASR) was performed in PAML using codeml (48) under the  
440 JTT+G4+F substitution model. Statistical confidence in each position's reconstructed state for each  
441 ancestor was determined from the posterior probability (PP), and only states with PP>0.8 were  
442 considered. Ancestral sequences from all nodes in the ATP1A phylogeny were retrieved from the  
443 codeml output, resulting in an alignment of 1,660 ATP1A proteins (831 extant species and 829  
444 inferred ancestral sequences; Fig. S1). For each branch in the tree, we determined the occurrence  
445 of substitutions by using the ancestral and derived amino acid states at each site using only states  
446 with PP>0.8. All branch pairs were compared, except sister branches and ancestor-descendent  
447 pairs (12, 13). When comparing substitutions on two distinct branches at the same site,  
448 substitutions to the same amino acid state were counted as convergences, while substitutions away  
449 from a common amino acid were counted as divergences. An alignment of 1,040 amino acids was  
450 used to calculate the number of molecular convergences and divergences, excluding a putative 30  
451 amino acid-long alternative spliced region (positions 834-864). Model-based estimates of sequence  
452 divergence, number of convergences, number of divergences, and total number of substitutions  
453 since the common ancestor were recorded for each pairwise comparison. We calculated the  
454 proportion of observed convergent events per branch as (number of convergences +1) / (number  
455 of divergences +1). The line describing the trend was calculated as a running average with window  
456 size of 0.05 substitutions/site. 95% confidence intervals were calculated based on 100 bootstrap  
457 replicates per window, resampling only variable sites.

458

459 For sites 111 and 122, molecular convergence was coded as "1" when the substitution along  
460 branch<sub>i</sub> was to the same amino acid state as the substitution along branch<sub>j</sub>, and "0" if substitutions  
461 were to different states. Model-based estimates of sequence divergence, amino acid state, and  
462 convergence event were recorded for each pairwise comparison (when convergence was "0",  
463 amino acid state was set to "NA"). A logistic regression between molecular convergence (0 or 1)  
464 and genetic distance was used to test for the correlation between variables (Fig 6B; Fig. S3)

465

#### 466 **Construction of expression vectors.**

467 ATP1A1 and ATP1B1 wild-type sequences for the eight selected tetrapod species (Fig 4) were  
468 synthesized by Invitrogen™ GeneArt. The  $\beta$ 1-subunit genes were inserted into pFastBac Dual  
469 expression vectors (Life Technologies) at the p10 promoter with XhoI and PaeI (FastDigest Thermo

470 Scientific™) and then control sequenced. The  $\alpha$ 1-subunit genes were inserted at the PH promoter  
471 of vectors already containing the corresponding  $\beta$ 1-subunit proteins using In-Fusion® HD Cloning  
472 Kit (Takara Bio, USA Inc.) and control sequenced. All resulting vectors had the  $\alpha$ 1-subunit gene  
473 under the control of the PH promoter and a  $\beta$ 1-subunit gene under the p10 promoter. The resulting  
474 eight vectors were then subjected to site-directed mutagenesis (QuickChange II XL Kit; Agilent  
475 Technologies, La Jolla, CA, USA) to introduce the codons of interest. In total, 21 vectors were  
476 produced (Table S3).

477

#### 478 **Generation of recombinant viruses and transfection into Sf9 cells.**

479 *Escherichia coli* DH10bac cells harboring the baculovirus genome (bacmid) and a transposition  
480 helper vector (Life Technologies) were transformed according to the manufacturer's protocol with  
481 expression vectors containing the different gene constructs. Recombinant bacmids were selected  
482 through PCR screening, grown, and isolated. Subsequently, Sf9 cells ( $4 \times 10^5$  cells\*ml) in 2 ml of  
483 Insect-Xpress medium (Lonza, Walkersville, MD, USA) were transfected with recombinant bacmids  
484 using Cellfectin reagent (Life Technologies). After a three-day incubation period, recombinant  
485 baculoviruses were isolated (P1) and used to infect fresh Sf9 cells ( $1.2 \times 10^6$  cells\*ml) in 10 ml of  
486 Insect-Xpress medium (Lonza, Walkersville, MD, USA) with 15 mg/ml gentamycin (Roth, Karlsruhe,  
487 Germany) at a multiplicity of infection of 0.1. Five days after infection, the amplified viruses were  
488 harvested (P2 stock).

489

#### 490 **Preparation of Sf9 membranes.**

491 For production of recombinant NKA, Sf9 cells were infected with the P2 viral stock at a multiplicity  
492 of infection of  $10^3$ . The cells ( $1.6 \times 10^6$  cells\*ml) were grown in 50 ml of Insect-Xpress medium  
493 (Lonza, Walkersville, MD, USA) with 15 mg/ml gentamycin (Roth, Karlsruhe, Germany) at 27°C in  
494 500 ml flasks (35). After 3 days, Sf9 cells were harvested by centrifugation at 20,000 x g for 10 min.  
495 The cells were stored at -80 °C and then resuspended at 0 °C in 15 ml of homogenization buffer  
496 (0.25 M sucrose, 2 mM EDTA, and 25 mM HEPES/Tris; pH 7.0). The resuspended cells were  
497 sonicated at 60 W (Bandelin Electronic Company, Berlin, Germany) for three 45 s intervals at 0 °C.  
498 The cell suspension was then subjected to centrifugation for 30 min at 10,000 x g (J2-21 centrifuge,  
499 Beckmann-Coulter, Krefeld, Germany). The supernatant was collected and further centrifuged for  
500 60 m at 100,000 x g at 4 °C (Ultra- Centrifuge L-80, Beckmann-Coulter) to pellet the cell  
501 membranes. The pelleted membranes were washed once and resuspended in ROTIPURAN® p.a.,  
502 ACS water (Roth) and stored at -20 °C. Protein concentrations were determined by Bradford assays  
503 using bovine serum albumin as a standard. Three biological replicates were produced for each  
504 NKA construct.

505



506 **Verification by SDS-PAGE/western blotting.**

507 For each biological replicate, 10 µg of protein were solubilized in 4x SDS-polyacrylamide gel  
508 electrophoresis sample buffer and separated on SDS gels containing 10% acrylamide.  
509 Subsequently, they were blotted on nitrocellulose membrane (HP42.1, Roth). To block non-specific  
510 binding sites after blotting, the membrane was incubated with 5% dried milk in TBS-Tween 20 for  
511 1 h. After blocking, the membranes were incubated overnight at 4 °C with the primary monoclonal  
512 antibody α5 (Developmental Studies Hybridoma Bank, University of Iowa, Iowa City, IA, USA).  
513 Since only membrane proteins were isolated from transfected cells, detection of the α subunit also  
514 indicates the presence of the β subunit. The primary antibody was detected using a goat-anti-  
515 mouse secondary antibody conjugated with horseradish peroxidase (Dianova, Hamburg,  
516 Germany). The staining of the precipitated polypeptide-antibody complexes was performed by  
517 addition of 60 mg 4-chloro-1 naphthol (Sigma-Aldrich, Taufkirchen, Germany) in 20 ml ice-cold  
518 methanol to 100 ml phosphate buffered saline (PBS) containing 60 µl 30% H<sub>2</sub>O<sub>2</sub>. See Fig. S6.

519

520 **Ouabain inhibition assay.**

521 To determine the sensitivity of each NKA construct against cardiotonic steroids (CTS), we used the  
522 water-soluble cardiac glycoside, ouabain (Acrōs Organics), as our representative CTS. 100 µg of  
523 each protein was pipetted into each well in a nine-well row on a 96-well microplate (Fisherbrand)  
524 containing stabilizing buffers (see buffer formulas in (49)). Each well in the nine-well row was  
525 exposed to exponentially decreasing concentrations (10<sup>-3</sup> M, 10<sup>-4</sup> M, 10<sup>-5</sup> M, 10<sup>-6</sup> M, 10<sup>-7</sup> M, 10<sup>-8</sup> M,  
526 dissolved in distilled H<sub>2</sub>O) of ouabain, distilled water only (experimental control), and a combination  
527 of an inhibition buffer lacking KCl and 10<sup>-2</sup> M ouabain to measure background protein activity (49).  
528 The proteins were incubated at 37°C and 200 rpms for 10 minutes on a microplate shaker  
529 (Quantifoil Instruments, Jena, Germany). Next, ATP (Sigma Aldrich) was added to each well and  
530 the proteins were incubated again at 37°C and 200 rpms for 20 minutes. The activity of NKA  
531 following ouabain exposure was determined by quantification of inorganic phosphate (Pi) released  
532 from enzymatically hydrolyzed ATP. Reaction Pi levels were measured according to the procedure  
533 described in Taussky and Shorr (50) (see Petschenka et al. (49)). All assays were run in duplicate  
534 and the average of the two technical replicates was used for subsequent statistical analyses.  
535 Absorbance for each well was measured at 650 nm with a plate absorbance reader (BioRad Model  
536 680 spectrophotometer and software package). See Table S4.

537

538 **ATP hydrolysis assay.**

539 To determine the functional efficiency of different NKA constructs, we calculated the amount of Pi  
540 hydrolyzed from ATP per mg of protein per minute. The measurements were obtained from the  
541 same assay as described above. In brief, absorbance from the experimental control reactions, in

542 which 100  $\mu\text{g}$  of protein was incubated without any inhibiting factors (i.e., ouabain or buffer  
543 excluding KCl), were measured and translated to mM Pi from a standard curve that was run in  
544 parallel (1.2 mM Pi, 1 mM Pi, 0.8 mM Pi, 0.6 mM Pi, 0.4 mM Pi, 0.2 mM Pi, 0 mM Pi). See Table  
545 S4.

546

#### 547 **Statistical analyses of functional data.**

548 Background phosphate absorbance levels from reactions with inhibiting factors were used to  
549 calibrate phosphate absorbance in wells measuring ouabain inhibition and in the control wells  
550 measuring non-inhibited NKA activity (49). For ouabain sensitivity measurements, calibrated  
551 absorbance values were converted to percentage non-inhibited NKA activity based on  
552 measurements from the control wells (49). These data were plotted and log  $\text{IC}_{50}$  values were  
553 obtained for each biological replicate from nonlinear fitting using a four-parameter logistic curve,  
554 with the top asymptote set to 100 and the bottom asymptote set to zero. Curve fitting was performed  
555 with the nlsLM function of the minipack.lm library in R. For comparisons of recombinant protein  
556 activity, the calculated Pi concentrations of 100  $\mu\text{g}$  of protein assayed in the absence of ouabain  
557 were converted to nmol Pi/mg protein/min.  $\text{IC}_{50}$  values were log-transformed. We used pairwise *t*-  
558 tests with Bonferroni corrections to identify significant differences between constructs with and  
559 without engineered substitutions. We used a two-way ANOVA to test for background dependence  
560 of substitutions (i.e., interaction between background and amino acid substitution) with respect to  
561 ouabain resistance (log  $\text{IC}_{50}$ ) and protein activity. Specifically, we tested whether the effects of a  
562 substitution X->Y are equal on different backgrounds (null hypothesis: X->Y (background 1) = X-  
563 >Y (background 2)). We further assumed that the effects of a substitution X->Y should exactly  
564 match that of Y->X. All statistical analyses were implemented in R. Data were plotted using the  
565 ggplot2 package in R.

566

567

568

#### 569 **Acknowledgments**

570

571 We thank C. Natarajan, P. Kowalski, M. Winter, and V. Wagschal for assistance in the laboratory,  
572 and D.A. Gómez-Sánchez for assistance in the field. We thank J. Oaks for providing tissue from  
573 ring-necked snake. **Funding:** This study was funded by grants from the National Institutes of Health  
574 to PA (R01-GM115523), JFS (R01-HL087216) and SM (F32-HL149172), the National Science  
575 Foundation (OIA-1736249) to JFS, the Deutsche Forschungsgemeinschaft (Do 517/10-1) to SD,  
576 and the Alexander von Humboldt Foundation to SM.

577

578

579

580 **References**

581

- 582 1. D. L. Stern, The genetic causes of convergent evolution. *Nat. Rev. Genet.* **14**, 751–764  
583 (2013).
- 584 2. J. F. Storz, Causes of molecular convergence and parallelism in protein evolution. *Nat. Rev.*  
585 *Genet.* **17**, 239 (2016).
- 586 3. D. L. Stern, *Evolution, development, & the predictable genome* (Roberts and Co. Publishers,  
587 2011).
- 588 4. P. C. Phillips, Epistasis—the essential role of gene interactions in the structure and  
589 evolution of genetic systems. *Nat. Rev. Genet.* **9**, 855–867 (2008).
- 590 5. W. Fitch, Rate of change of concomitantly variable codons. *J. Mol. Evol.* **1**, 84–96 (1971).
- 591 6. B. Callahan, R. A. Neher, D. Bachtrog, P. Andolfatto, B. I. Shraiman, Correlated evolution of  
592 nearby residues in Drosophilid proteins. *PLoS Genet.* **7**, e1001315 (2011).
- 593 7. T. N. Starr, J. W. Thornton, Epistasis in protein evolution. *Protein Sci.* **25**, 1204–1218  
594 (2016).
- 595 8. J. F. Storz, Compensatory mutations and epistasis for protein function. *Curr. Opin. Struct.*  
596 *Biol.* **50**, 18–25 (2018).
- 597 9. D. D. Pollock, G. Thiltgen, R. A. Goldstein, Amino acid coevolution induces an evolutionary  
598 Stokes shift. *Proc. Natl. Acad. Sci.* **109**, E1352 (2012).
- 599 10. P. Shah, D. M. McCandlish, J. B. Plotkin, Contingency and entrenchment in protein  
600 evolution under purifying selection. *Proc. Natl. Acad. Sci.* **112**, E3226 (2015).
- 601 11. V. O. Pokusaeva, *et al.*, An experimental assay of the interactions of amino acids from  
602 orthologous sequences shaping a complex fitness landscape. *PLoS Genet.* **15**, e1008079  
603 (2019).
- 604 12. R. A. Goldstein, S. T. Pollard, S. D. Shah, D. D. Pollock, Nonadaptive amino acid  
605 convergence rates decrease over time. *Mol. Biol. Evol.* **32**, 1373–1381 (2015).
- 606 13. Z. Zou, J. Zhang, Are convergent and parallel amino acid substitutions in protein evolution  
607 more prevalent than neutral expectations? *Mol. Biol. Evol.* **32**, 2085–2096 (2015).
- 608 14. Z. Zou, J. Zhang, Gene tree discordance does not explain away the temporal decline of  
609 convergence in mammalian protein sequence evolution. *Mol. Biol. Evol.* **34**, 1682–1688  
610 (2017).
- 611 15. J. B. Lingrel, The physiological significance of the cardiotonic steroid/ouabain-binding site  
612 of the Na, K-ATPase. *Annu. Rev. Physiol.* **72**, 395–412 (2010).

- 613 16. A. Koksoy, Na<sup>+</sup>, K<sup>+</sup>-ATPase: a review. *J Ank. Med Sch* **24**, 73–82 (2002).
- 614 17. S. Dobler, S. Dalla, V. Wagschal, A. A. Agrawal, Community-wide convergent evolution in  
615 insect adaptation to toxic cardenolides by substitutions in the Na, K-ATPase. *Proc. Natl.*  
616 *Acad. Sci.* **109**, 13040–13045 (2012).
- 617 18. Y. Zhen, M. L. Aardema, E. M. Medina, M. Schumer, P. Andolfatto, Parallel molecular  
618 evolution in an herbivore community. *Science* **337**, 1634–1637 (2012).
- 619 19. D. J. Moore, D. C. Halliday, D. M. Rowell, A. J. Robinson, J. S. Keogh, Positive Darwinian  
620 selection results in resistance to cardioactive toxins in true toads (Anura: Bufonidae). *Biol.*  
621 *Lett.* **5**, 513–516 (2009).
- 622 20. B. Ujvari, *et al.*, Widespread convergence in toxin resistance by predictable molecular  
623 evolution. *Proc. Natl. Acad. Sci.* **112**, 11911–11916 (2015).
- 624 21. S. Mohammadi, *et al.*, Toxin-resistant isoforms of Na<sup>+</sup>/K<sup>+</sup>-ATPase in snakes do not closely  
625 track dietary specialization on toads. *Proc. R. Soc. B Biol. Sci.* **283**, 20162111 (2016).
- 626 22. S. Mohammadi, L. Yang, M. Bulbert, H. M. Rowland, The evolutionary and behavioural  
627 ecology of cardiotoxic steroid resistance in predators (In prep).
- 628 23. A. M. Taverner, *et al.*, Adaptive substitutions underlying cardiac glycoside insensitivity in  
629 insects exhibit epistasis in vivo. *eLife* **8**, e48224 (2019).
- 630 24. M. Karageorgi, *et al.*, Genome editing retraces the evolution of toxin resistance in the  
631 monarch butterfly. *Nature* **574**, 409–412 (2019).
- 632 25. S. Mohammadi, *et al.*, Concerted evolution reveals co-adapted amino acid substitutions in  
633 frogs that prey on toxic toads. *Curr. Biol.* **31**, 2530-2538.e10 (2021).
- 634 26. E. M. Price, J. B. Lingrel, Structure-function relationships in the sodium-potassium ATPase.  
635 alpha. subunit: site-directed mutagenesis of glutamine-111 to arginine and asparagine-122  
636 to aspartic acid generates a ouabain-resistant enzyme. *Biochemistry* **27**, 8400–8408  
637 (1988).
- 638 27. K. J. Sweadner, *et al.*, Genotype-structure-phenotype relationships diverge in paralogs  
639 ATP1A1, ATP1A2, and ATP1A3. *Neurol. Genet.* **5**, e303–e303 (2019).
- 640 28. A. Mobasheri, *et al.*, Na<sup>+</sup>, K<sup>+</sup>-ATPase isozyme diversity; comparative biochemistry and  
641 physiological implications of novel functional interactions. *Biosci. Rep.* **20**, 51–91 (2000).
- 642 29. B. Ujvari, *et al.*, Isolation breeds naivety: island living robs Australian varanid lizards of  
643 toad-toxin immunity via four-base-pair mutation. *Evol. Int. J. Org. Evol.* **67**, 289–294  
644 (2013).
- 645 30. B. M. Marshall, *et al.*, Widespread vulnerability of Malagasy predators to the toxins of an  
646 introduced toad. *Curr. Biol.* **28**, R654–R655 (2018).

- 647 31. S. Groen, N. Whiteman, Convergent evolution of cardiac-glycoside resistance in predators  
648 and parasites of milkweed herbivores. *Curr. Biol.* **31**, R1465–R1466 (2021).
- 649 32. M. Lunzer, G. B. Golding, A. M. Dean, Pervasive cryptic epistasis in molecular evolution.  
650 *PLoS Genet* **6**, e1001162 (2010).
- 651 33. L. Yang, *et al.*, Predictability in the evolution of Orthopteran cardenolide insensitivity.  
652 *Philos. Trans. R. Soc. B* **374**, 20180246 (2019).
- 653 34. A. Stoltzfus, D. M. McCandlish, Mutational Biases Influence Parallel Adaptation. *Mol. Biol.*  
654 *Evol.* **34**, 2163–2172 (2017).
- 655 35. J. Zhang, S. Kumar, Detection of convergent and parallel evolution at the amino acid  
656 sequence level. *Mol. Biol. Evol.* **14**, 527–536 (1997).
- 657 36. L. F. Toledo, R. Ribeiro, C. F. Haddad, Anurans as prey: an exploratory analysis and size  
658 relationships between predators and their prey. *J. Zool.* **271**, 170–177 (2007).
- 659 37. S. Dobler, *et al.*, New ways to acquire resistance: imperfect convergence in insect  
660 adaptations to a potent plant toxin. *Proc. R. Soc. B* **286**, 20190883 (2019).
- 661 38. M. V. Clausen, F. Hilbers, H. Poulsen, The structure and function of the Na, K-ATPase  
662 isoforms in health and disease. *Front. Physiol.* **8**, 371 (2017).
- 663 39. J. A. Wells, Additivity of mutational effects in proteins. *Biochemistry* **29**, 8509–8517 (1990).
- 664 40. M. Lunzer, S. P. Miller, R. Felsheim, A. M. Dean, The biochemical architecture of an ancient  
665 adaptive landscape. *Science* **310**, 499–501 (2005).
- 666 41. L. I. Gong, M. A. Suchard, J. D. Bloom, Stability-mediated epistasis constrains the evolution  
667 of an influenza protein. *Elife* **2**, e00631 (2013).
- 668 42. P. Nosil, *et al.*, Ecology shapes epistasis in a genotype–phenotype–fitness map for stick  
669 insect colour. *Nat. Ecol. Evol.* **4**, 1673–1684 (2020).
- 670 43. B. J. Haas, *et al.*, De novo transcript sequence reconstruction from RNA-seq using the  
671 Trinity platform for reference generation and analysis. *Nat. Protoc.* **8**, 1494–1512 (2013).
- 672 44. D. Darriba, *et al.*, ModelTest-NG: a new and scalable tool for the selection of DNA and  
673 protein evolutionary models. *Mol. Biol. Evol.* **37**, 291–294 (2020).
- 674 45. A. Stamatakis, RAxML version 8: a tool for phylogenetic analysis and post-analysis of large  
675 phylogenies. *Bioinformatics* **30**, 1312–1313 (2014).
- 676 46. S. Guindon, *et al.*, New algorithms and methods to estimate maximum-likelihood  
677 phylogenies: assessing the performance of PhyML 3.0. *Syst. Biol.* **59**, 307–321 (2010).

- 678 47. G. Yu, D. K. Smith, H. Zhu, Y. Guan, T. T. Lam, ggtree: an R package for visualization and  
679 annotation of phylogenetic trees with their covariates and other associated data. *Methods*  
680 *Ecol. Evol.* **8**, 28–36 (2017).
- 681 48. Z. Yang, PAML 4: phylogenetic analysis by maximum likelihood. *Mol. Biol. Evol.* **24**, 1586–  
682 1591 (2007).
- 683 49. G. Petschenka, *et al.*, Stepwise evolution of resistance to toxic cardenolides via genetic  
684 substitutions in the Na<sup>+</sup>/K<sup>+</sup>-ATPase of milkweed butterflies (Lepidoptera: Danaini).  
685 *Evolution* **67**, 2753–2761 (2013).
- 686 50. H. H. Taussky, E. Shorr, A microcolorimetric method for the determination of inorganic  
687 phosphorus. *J. Biol. Chem.* **202**, 675–685 (1953).
- 688
- 689

690 **Figures and Tables**

691

692

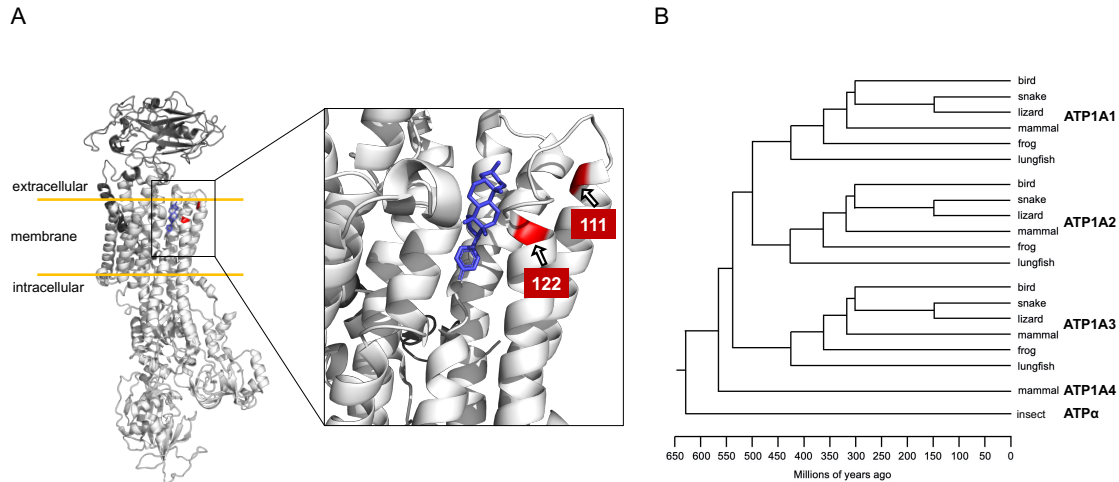

693

694 **Figure 1. Na<sup>+</sup>,K<sup>+</sup>-ATPase structure and phylogenetic relationships of ATP1A paralogs among**  
695 **vertebrates.** (A) Crystal structure of an Na<sup>+</sup>,K<sup>+</sup>-ATPase (NKA) with a bound the representative CTS  
696 bufalin in blue (PDB 4RES). The zoomed-in panel shows the H1-H2 extracellular loop, highlighting  
697 two amino acid positions (111 and 122 in red) that have been implicated repeatedly in CTS  
698 resistance. We highlight key examples of convergence in amino acid substitutions at sites in the  
699 H1-H2 extracellular loop associated with CTS resistance in Fig 3. (B) Phylogenetic relationships  
700 among ATP1A paralogs of vertebrates and ATPα of insects.  
701



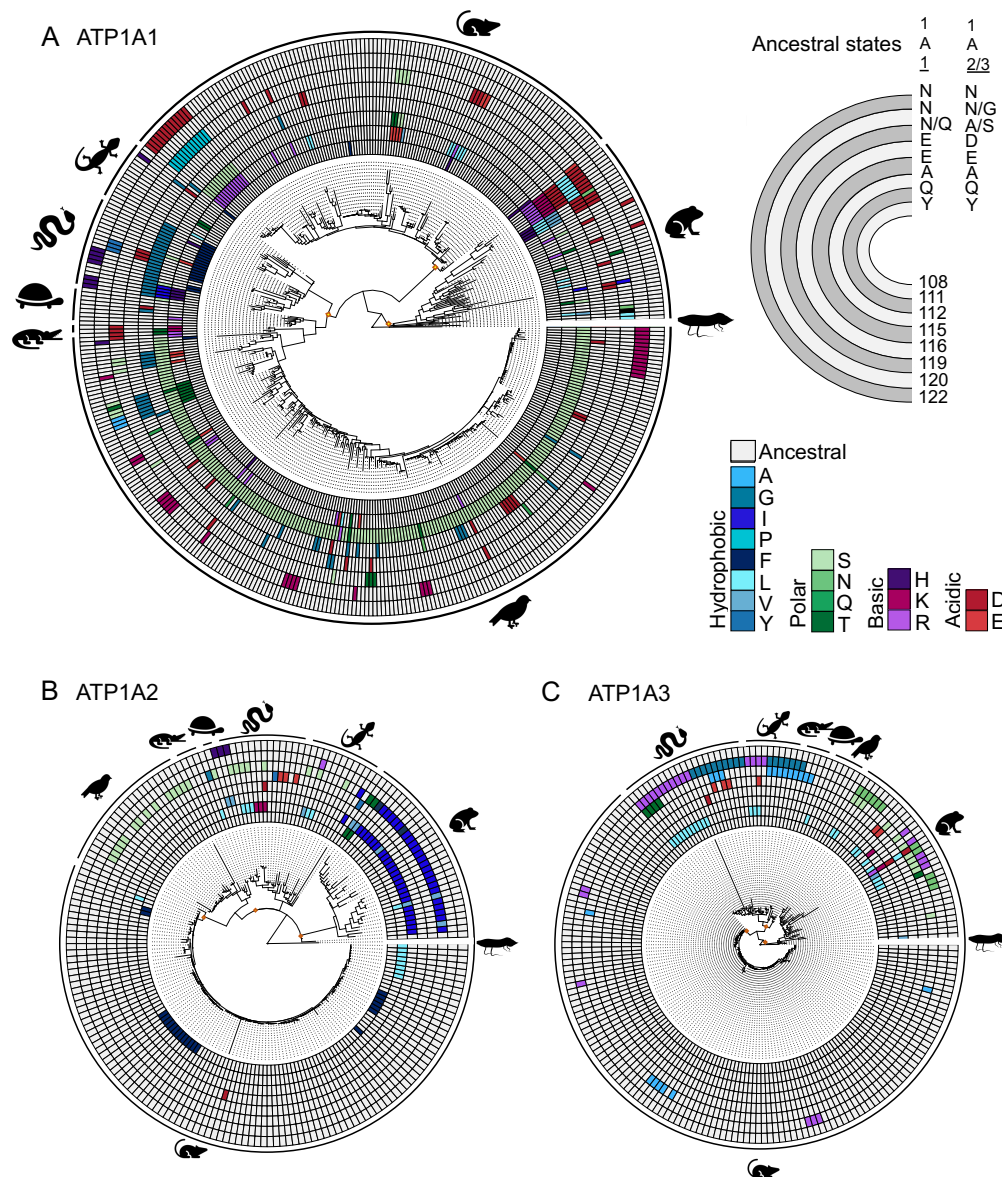

702

703

704 **Figure 2. Patterns of molecular evolution in the  $\alpha$ (M1–M2) extracellular loop of ATP1A**  
 705 **paralogs shared among tetrapods.** (A) Maximum likelihood phylogeny of tetrapod ATP1A1, (B)  
 706 ATP1A2, and (C) ATP1A3. The character states for eight sites relevant to CTS resistance in and  
 707 near the H1-H2 loop of the NKA protein are shown at the node tips. Yellow internal nodes indicate  
 708 ancestral sequences reconstructed to infer derived amino acid states across clades to ease  
 709 visualization; nodes reconstructed: MRCA of mammals, reptiles, and amphibians. *Top right*, each  
 710 semi-circle indicates the site mapped in the main phylogeny with the inferred ancestral amino acid  
 711 state for each of the three yellow nodes (posterior probability >0.8). In ATP1A1, site 119 was  
 712 inferred as Q119 for amphibians and mammals, and N119 for reptiles (Table S6); in ATP1A2-3 site  
 713 119 was inferred as A119 for amphibians and reptiles, and S119 for mammals (Table S6). Site  
 714 number corresponds to pig (*Sus scrofa*) reference sequence. Higher number and variation of  
 715 substitutions in ATP1A1 stand out in comparison to the other paralogs.  
 716

717

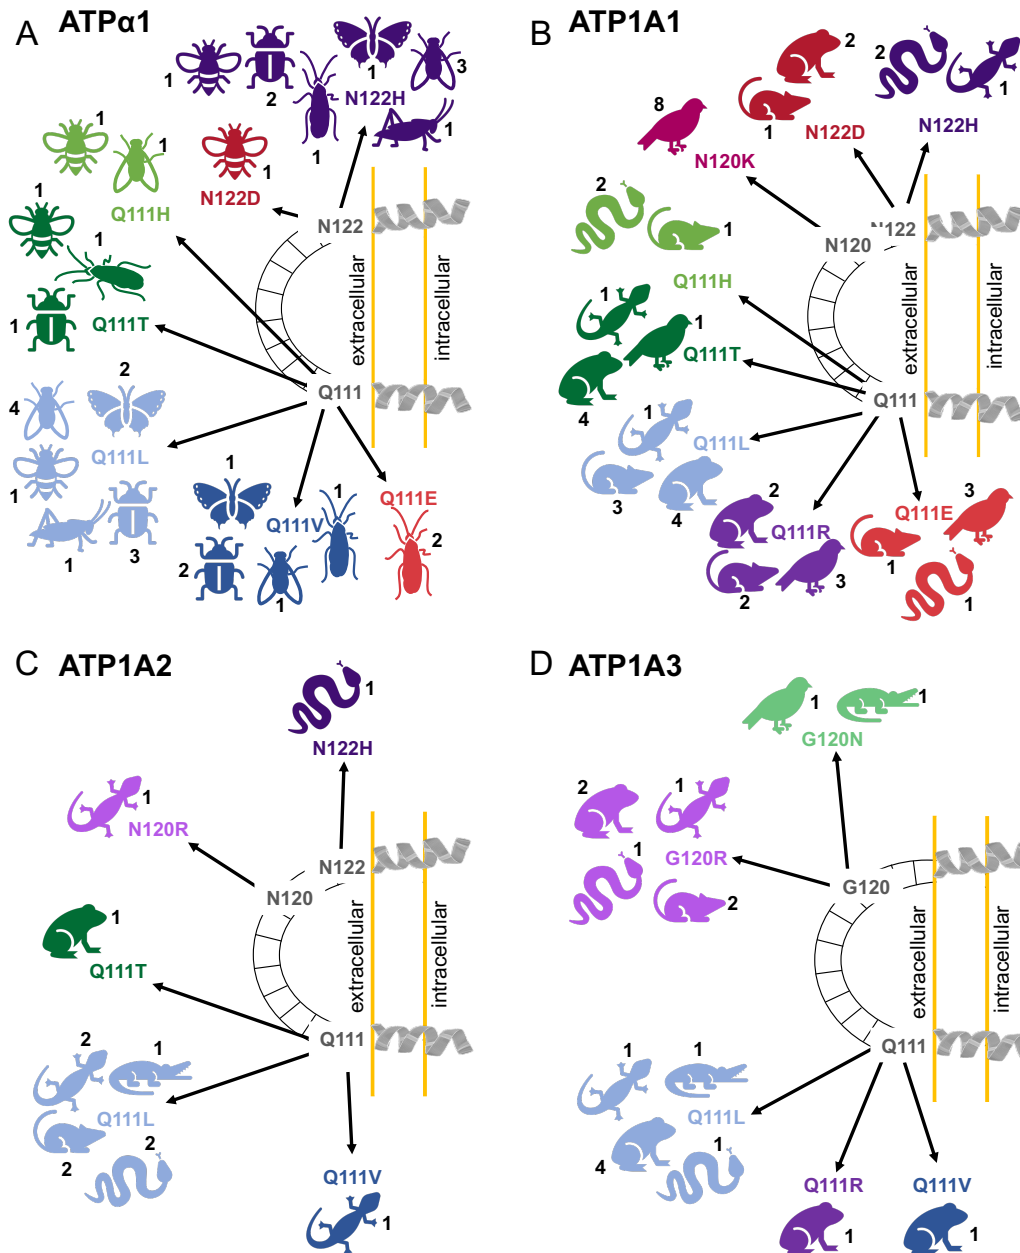

718

719

720

721

722

723

724

725

726

727

**Figure 3. Parallel and divergent patterns of CTS-resistant substitutions across ATP $\alpha$ 1 of insects and the shared ATP1A paralogs of tetrapods.** Examples of convergence in ATP $\alpha$ 1 across insects (A). Convergence in the (B) ATP1A1, (C) ATP1A2, and (D) ATP1A3 paralogs, respectively, across tetrapods. Numbers indicate the number of independent substitutions in each major clade depicted. For ATP1A3, resistance-conferring amino acid substitutions have been identified at site 120, and not 122. A full list of amino acid substitutions can be found in Supplementary Dataset 2 for tetrapods, and Taverner et al. (23) for insects.

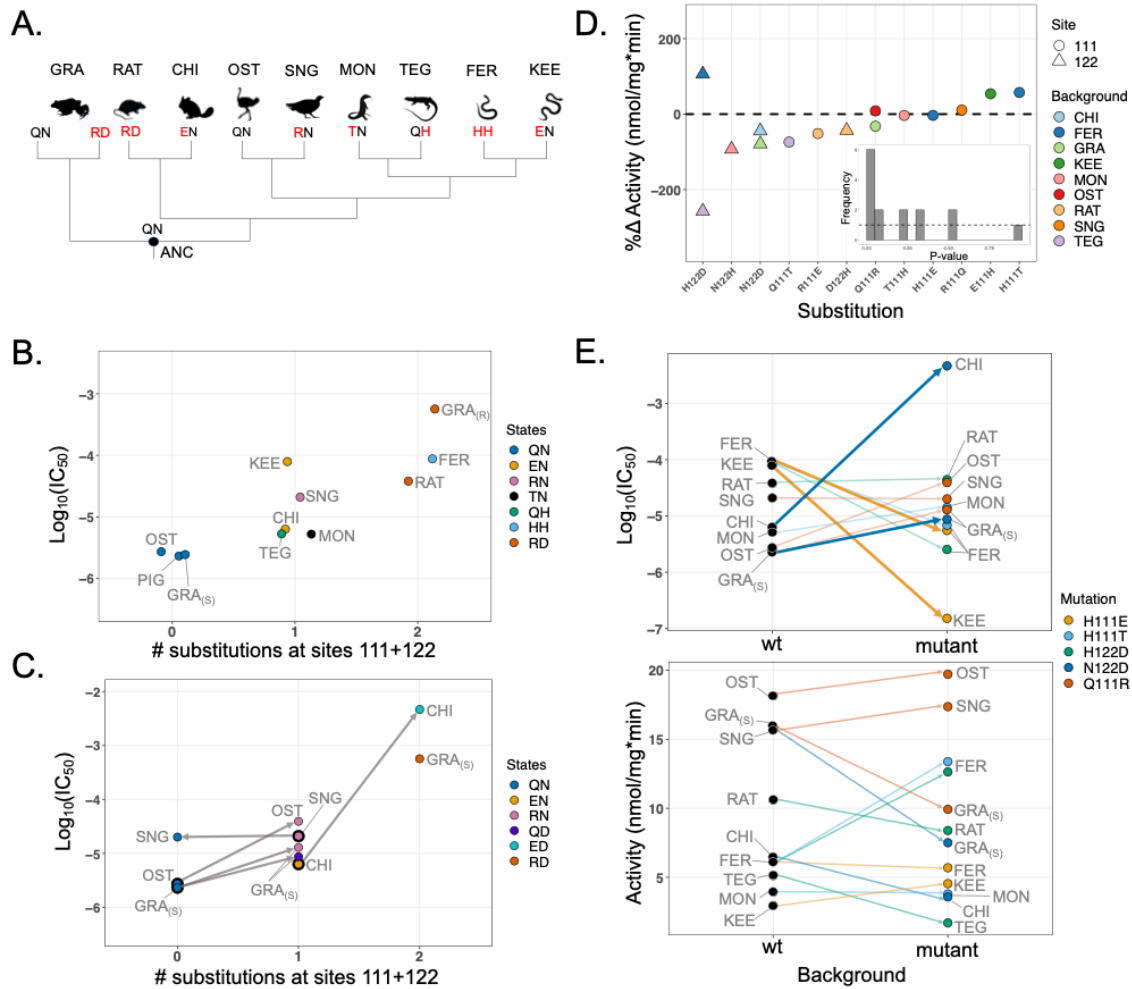

728

729 **Figure 4. Functional properties of wild-type and engineered ATP1A1.** (A) Cladogram  
 730 relating the surveyed species. GRA: Grass Frog (*Leptodactylus*); RAT: Rat (*Rattus*); CHI:  
 731 Chinchilla (*Chinchilla*); OST: Ostrich (*Struthio*); SNG: Sandgrouse (*Pterocles*); MON: Monitor  
 732 lizard (*Varanus*); TEG: Tegu lizard (*Tupinambis*); FER: False fer-de-lance (*Xenodon*); KEE: Red-  
 733 necked keelback snake (*Rhabdophis*). Two-letter codes underneath each avatar indicate native  
 734 amino acid states at sites 111 and 122, respectively. Data for grass frog from Mohammadi et al.  
 735 (2021). (B) Levels of CTS resistance ( $\text{IC}_{50}$ ) among wild-type enzymes. The x-axis distinguishes  
 736 among ATP1A1 with 0, 1 or 2 derived states at sites 111 and 122. The subscripts S and R refer  
 737 to the CTS-sensitive and CTS-resistant paralogs, respectively. (C) Effects of changing the  
 738 number of substitutions at 111 or 122 on CTS resistance ( $\text{IC}_{50}$ ). Substitutions result in  
 739 predictable changes to resistance except in the reversal R111Q in Sandgrouse (SNG). GRA<sub>S</sub>  
 740 represents Q111R+N122D on the sensitive paralog background. (D) Effects of single  
 741 substitutions on  $\text{Na}^+, \text{K}^+$ -ATPase (NKA) activity. Each modified ATP1A1 is compared to the wild-  
 742 type enzyme for that species. The inset shows the distribution of *t*-test p-values for all 15  
 743 substitutions, with the dotted line indicating the expectation. (E) Evidence for epistasis for CTS  
 744 resistance ( $\text{IC}_{50}$ , upper panel) and lack of such effects for enzyme activity (lower panel). Each  
 745 line compares the same substitution (or the reverse substitution) tested on at least two  
 746 backgrounds. Thicker lines correspond to substitutions with significant sequence-context  
 747 dependent effects (Bonferroni-corrected ANOVA p-values < 0.05, Table S5).

748

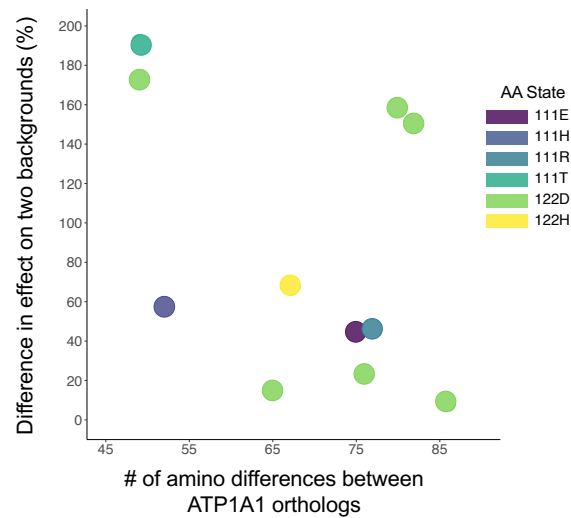

749  
750

751 **Figure 5. No relationship between the effect of substitution to a given amino state on activity**  
752 **and the extent of divergence between ATP1A1 orthologs.** Each point represents a comparison  
753 between the effect (% change in activity relative to the wild-type enzyme) of a given amino acid  
754 state (e.g., 122D) on two different genetic backgrounds. For example, the effect of 122D between  
755 chinchilla and false fer-de-lance is measured as % change [chinchilla vs. chinchilla+N122D] minus  
756 the % change [false fer-de-lance vs. false fer-de-lance+H122D]. Comparisons were measured as  
757 the difference between the two effects. In total, 11 comparisons were possible. The x-axis  
758 represents the number of amino acid differences between two ATP1A1 proteins being compared.  
759 Assuming intramolecular epistasis for protein function is prevalent, a positive correlation is  
760 predicted. However, no such relationship is observed (Spearman's correlation,  $r_s = -0.42$ ,  $p = 0.19$ ).

761

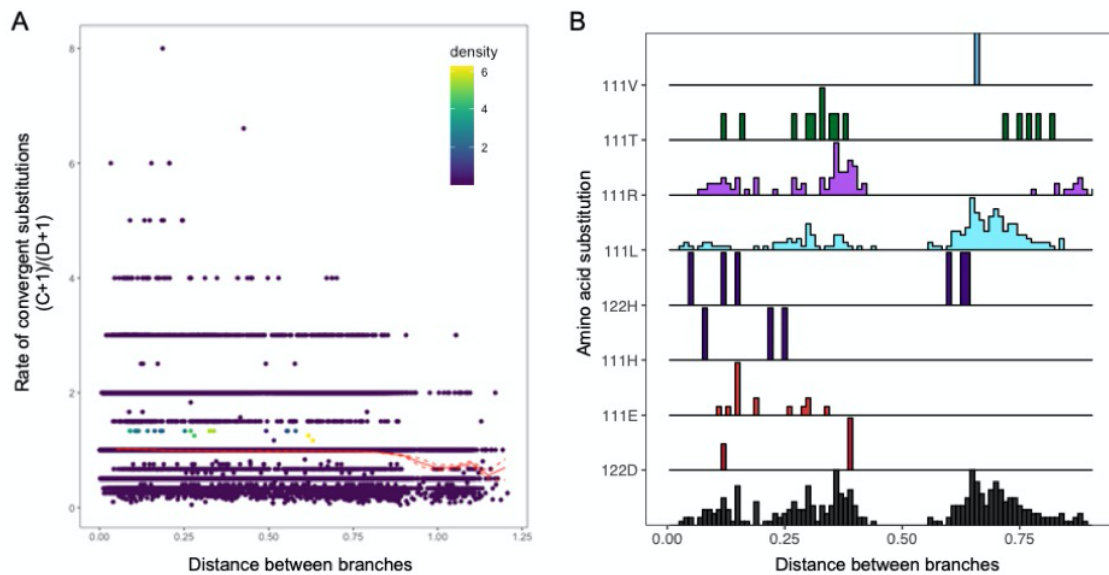

762

763 **Figure 6. Rate of convergence across ATP1A sequences as a function of increasing**  
764 **sequence divergence. (A)** Change in the rate of convergence (protein wide) over time for the  
765 ATP1A protein family. The proportion of convergent (C) over divergent (D) substitutions along  
766 the entire protein sequence was estimated for all pairs of branches in the ATP1A phylogeny, except  
767 for sister branches or ancestor-descendant pairs. Color scale shows the density of dots for both  
768 axes. The distance between branches corresponds to the expected number of amino acid  
769 substitutions per site between protein pairs being compared (under the JTT+G4+F model). The red  
770 line shows a running average with a window size of 0.05 substitutions/site. Dashed lines show the  
771 95% confidence interval based on 100 bootstrap replicates per window. **(B)** For each derived amino  
772 acid state at sites 111 and 122, the histograms show the distribution of pairwise convergent events  
773 along the sequence divergence axis (expected number of substitutions per site). Substitutions are  
774 color coded as in Figure 2. The histogram at the bottom shows the combined distribution of pairwise  
775 convergent events for both sites.
